# Supplementary material for: Development and validation of a risk score for predicting mortality after resection of primary hepatocellular carcinoma
Source: publisher site journal article supplement (doi:10.18632/aging.103360), 2020-06-21
Supplement: Supplementary file [file aging-v12i12-103360-supplementary-material-SD1.pdf]

**SUPPLEMENTARY FIGURE**

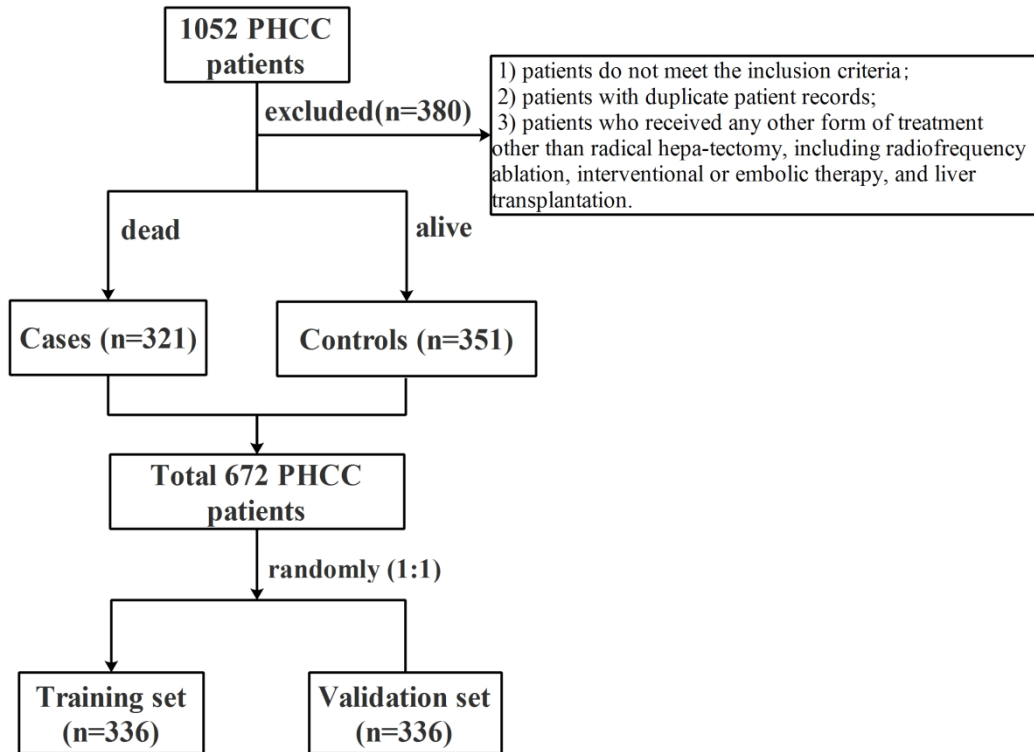

**Supplementary Figure 1. Study flowchart of PHCC cases chosen.**
