# Supplementary material for: Development and validation of a risk score for predicting mortality after resection of primary hepatocellular carcinoma
Source: publisher site journal article supplement (doi:10.18632/aging.103360), 2020-06-21
Supplement: Supplementary file [file aging-v12i12-103360-supplementary-material-SD2.pdf]

## SUPPLEMENTARY TABLE

**Supplementary Table 1. Baseline demographics and clinical characteristics of patients in training cohort and validation cohort.**

| Variables                        | Training set N=336 | Validation set N=336 | P-value |
|----------------------------------|--------------------|----------------------|---------|
| <b>Continuous variables</b>      |                    |                      |         |
| Age(years)                       | 57.0(49.0,63.0)    | 57.0(48.5,64.0)      | 0.612   |
| Height(cm)                       | 168.0(160.5,170.0) | 168.0(162.0,170.0)   | 0.730   |
| Weight(kg)                       | 62.0(56.0,70.0)    | 63.0(56.8,68.0)      | 0.373   |
| BMI (kg/m <sup>2</sup> )         | 22.8(20.8,24.8)    | 22.2(20.6,24.1)      | 0.057   |
| Tumor size(cm)                   | 3.5(2.5,5.0)       | 4.0(2.5,6.0)         | 0.031   |
| PT (seconds)                     | 13.9(13.3,14.7)    | 13.9(13.3,14.8)      | 0.650   |
| FIB(g/L)                         | 2.8(2.4,3.4)       | 2.8(2.4,3.6)         | 0.388   |
| Neutrophil (x10 <sup>9</sup> /L) | 3.2(2.4,4.2)       | 3.2(2.4,4.3)         | 0.933   |
| Monocyte (x10 <sup>9</sup> /L)   | 0.4(0.3,0.6)       | 0.4(0.3,0.6)         | 0.241   |
| Lymphocyte (x10 <sup>9</sup> /L) | 1.4(1.0,1.8)       | 1.4(1.1,1.8)         | 0.945   |
| Platelet (x10 <sup>9</sup> /L)   | 136.0(94.5,171.0)  | 147.0(100.0,191.0)   | 0.026   |
| ALB (g/L)                        | 39.7(36.3,43.0)    | 40.0(35.9,43.3)      | 0.761   |
| TBIL(μmol/L)                     | 11.0(8.0,16.0)     | 11.0(8.0,16.0)       | 0.519   |
| TC (mmol/l)                      | 4.3(3.5,4.9)       | 4.3(3.7,4.9)         | 0.212   |
| ALT(U/L)                         | 34.0(24.0,54.5)    | 35.0(22.5,50.5)      | 0.466   |
| AST(U/L)                         | 40.5(30.0,68.0)    | 37.0(28.0,60.0)      | 0.158   |
| γ-GT(U/L)                        | 54.0(34.0,106.0)   | 50.5(31.5,95.5)      | 0.295   |
| <b>Discrete variables</b>        |                    |                      |         |
| Sex                              |                    |                      | 1.000   |
| Man                              | 280(83.3)          | 280(83.3)            |         |
| Woman                            | 56(16.7)           | 56(16.7)             |         |
| History of alcohol abuse         |                    |                      | 0.060   |
| No                               | 185(55.1)          | 209(62.2)            |         |
| Yes                              | 151(44.9)          | 127(37.8)            |         |
| Nerve infiltration               |                    |                      | 1.000   |
| No                               | 336(100.0)         | 335(99.7)            |         |
| Yes                              | 0(0.0)             | 1(0.3)               |         |
| Bile duct infiltration           |                    |                      | 0.808   |
| No                               | 299(89.0)          | 297(88.4)            |         |
| Yes                              | 37(11.0)           | 39(11.6)             |         |
| LNM                              |                    |                      | 0.401   |
| No                               | 328(97.6)          | 331(98.5)            |         |
| Yes                              | 8(2.4)             | 5(1.5)               |         |
| Tumor grade                      |                    |                      | 0.139   |
| Grade1/2                         | 254(75.6)          | 237(70.5)            |         |
| Grade3/4                         | 82(24.4)           | 99(29.5)             |         |
| Peri-cancerous invasion          |                    |                      | 0.406   |
| No                               | 322(95.8)          | 326(97.0)            |         |
| Yes                              | 14(4.2)            | 10(3.0)              |         |
| Intrahepatic metastasis          |                    |                      | 0.682   |
| No                               | 334(99.4)          | 332(98.8)            |         |
| Yes                              | 2(0.6)             | 4(1.2)               |         |
| Tumor capsule                    |                    |                      | 0.576   |
| No                               | 265(78.9)          | 259(77.1)            |         |
| Yes                              | 71(21.1)           | 77(22.9)             |         |
| Satellite nodules                |                    |                      | 0.636   |
| No                               | 313(93.2)          | 316(94.0)            |         |
| Yes                              | 23(6.8)            | 20(6.0)              |         |

|                       |           |           |       |
|-----------------------|-----------|-----------|-------|
| Single/multiple       |           |           | 0.810 |
| No                    | 296(88.1) | 298(88.7) |       |
| Yes                   | 40(11.9)  | 38(11.3)  |       |
| PVTT                  |           |           | 0.154 |
| No                    | 327(97.3) | 320(95.2) |       |
| Yes                   | 9(2.7)    | 16(4.8)   |       |
| Vascular infiltration |           |           | 0.270 |
| No                    | 318(94.6) | 311(92.6) |       |
| Yes                   | 18(5.4)   | 25(7.4)   |       |
| IATO                  |           |           | 0.211 |
| No                    | 316(94.0) | 323(96.1) |       |
| Yes                   | 20(6.0)   | 13(3.9)   |       |
| Cirrhosis             |           |           | 0.070 |
| No                    | 98(29.2)  | 120(35.7) |       |
| Yes                   | 238(70.8) | 216(64.3) |       |
| Ascites               |           |           | 0.674 |
| No                    | 284(84.5) | 280(83.3) |       |
| Yes                   | 52(15.5)  | 56(16.7)  |       |
| HBsAg                 |           |           | 0.098 |
| Negative              | 57(17.0)  | 74(22.0)  |       |
| Positive              | 279(83.0) | 262(78.0) |       |
| AFP (ug/L)            |           |           | 0.124 |
| <400                  | 264(78.6) | 247(73.5) |       |
| ≥400                  | 72(21.4)  | 89(26.5)  |       |
| TNM stage             |           |           | 0.984 |
| I                     | 269(80.1) | 269(80.1) |       |
| II                    | 25(7.4)   | 24(7.1)   |       |
| III/IV                | 42(12.5)  | 43(12.8)  |       |
| Child-Pugh class      |           |           | 0.756 |
| A                     | 233(69.3) | 228(67.9) |       |
| B                     | 101(30.1) | 107(31.8) |       |
| C                     | 2(0.6)    | 1(0.3)    |       |
| CLIP                  |           |           | 0.757 |
| 0                     | 156(46.4) | 139(41.4) |       |
| 1                     | 104(31.0) | 101(30.1) |       |
| 2                     | 43(12.8)  | 49(14.6)  |       |
| 3                     | 26(7.7)   | 28(8.3)   |       |
| 4                     | 7(2.1)    | 18(5.4)   |       |
| 5                     | 0(0.0)    | 1(0.3)    |       |
| Okuda                 |           |           | 0.247 |
| I                     | 265(78.9) | 252(75.0) |       |
| II                    | 70(20.8)  | 80(23.8)  |       |
| III                   | 1(0.3)    | 4(1.2)    |       |
| BCLC                  |           |           | 0.805 |
| A                     | 289(86.0) | 286(85.1) |       |
| B                     | 13(3.9)   | 11(3.3)   |       |
| C                     | 32(9.5)   | 35(10.4)  |       |
| D                     | 2(0.6)    | 4(1.2)    |       |

Abbreviations: BMI: body mass index; FIB, fibrinogen; ALB, albumin; PT: prothrombin time; TBIL: total bilirubin; TC: total cholesterol; ALT: alanine transaminase; AST: aspartate transaminase;  $\gamma$ -GT:  $\gamma$ -glutamyl transpeptidase; LNM: lymph node metastasis; PVTT: portal vein tumor thrombus; IATO: invasion of adjacent tissues or organs; AFP: alpha fetoprotein; TNM: Tumor–Node–Metastasis; CLIP: Cancer of the Liver Italian Program; BCLC: Barcelona Clinic Liver Cancer.
